# Supplementary material for: Assembly of Cell-Free Synthesized Ion Channel Molecules in Artificial Lipid Bilayer Observed by Atomic Force Microscopy
Source: MDPI journal article supplement (doi:10.3390/membranes13110854), 2023-10-25
Supplement: s1 [file s1]

## Assembly of cell-free synthesized ion channel molecules in artificial lipid bilayer observed by atomic force microscopy

Melvin Wei Shern Goh <sup>1</sup>, Yuzuru Tozawa <sup>2</sup> and Ryugo Tero <sup>1,\*</sup>

<sup>1</sup> Department of Applied Chemistry and Life Science, Toyohashi University of Technology, Toyohashi, 441-8580, Japan; melvin.goh.wei.shern.dk@tut.jp (M. W. S. G)

<sup>2</sup> Graduate School of Science and Engineering, Saitama University, 255 Shimo-Okubo, Sakura-ku, Saitama, 338-8570, Japan; tozawa@mail.saitama-u.ac.jp

\* Correspondence: tero@tut.jp

### Morphology of SLB made from PC+PE+Chol-vesicles without hERG channel

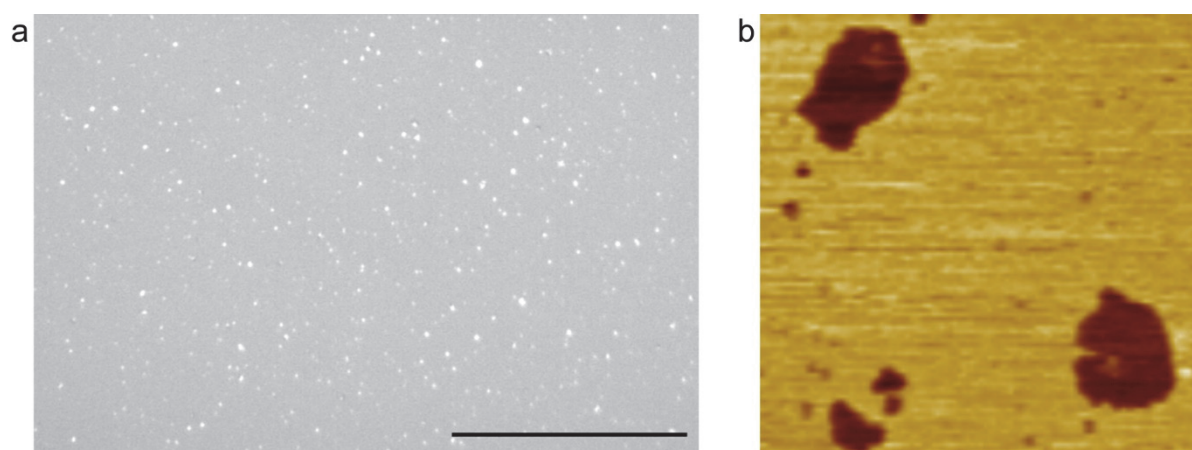

**Figure S1.** (a) A fluorescence image (Scale bars = 50  $\mu\text{m}$ ) and (b) an AFM topography ( $2.0 \times 2.0 \mu\text{m}^2$ ) of the SLB prepared from PC+PE+Chol-vesicles that did not include the hERG channel. The PC+PE+Chol-vesicles contained 0.26 mol% of a dye-labeled lipid, dipalmitoylphosphatidylethanolamine-*N*-lissamine rhodamine B.

### Number of hERG channel oligomers

**Table S1.** The number of hERG channel oligomers observed in the AFM topographies of the PC+PE+Chol-SLB, including hERG channel molecules.

|        | Monomer | Dimer | Trimer | Tetramer |
|--------|---------|-------|--------|----------|
| Number | 122     | 41    | 7      | 3        |
